# Supplementary material
Source: PubMed Central journal article supplement (PMC7720926)
Supplement: NIHMS1619981-supplement-1.pdf [file NIHMS1619981-supplement-1.pdf]

# Supplementary Appendix

Thirty-day re-observation, chronic re-observation, and neighborhood disadvantage

# Supplementary Appendix

## Table of Contents

|                                                                                                                                                                |     |
|----------------------------------------------------------------------------------------------------------------------------------------------------------------|-----|
| List of Investigators .....                                                                                                                                    | 2   |
| Supplemental Figure. Sample derivation of original Medicare 20% random sample, including observation stays between January 1, 2014 and November 30, 2014 ..... | 3   |
| Supplemental Table 1. Level 1 Clinical Classification Software codes for re-observation diagnoses .....                                                        | 4   |
| Supplemental Table 2. Unadjusted and fully adjusted 30-day re-observation risk for each individual covariate .....                                             | 5-8 |

## **List of Investigators**

Ann M. Sheehy, MD, MS; W. Ryan Powell, MA, PhD; Farah A. Kaiksow, MPP, MD; William R  
Buckingham, PhD; Christie M. Bartels, MD, MS; Jen Birstler, MS; Menggang Yu, PhD; Andrea  
Gilmore Bykovskyi, PhD, RN; Fangfang Shi, MS; Amy J. H. Kind, MD, PhD

Supplemental Figure. Sample derivation of original Medicare 20% random sample, including observation stays between January 1, 2014 and November 30, 2014.<sup>a</sup>

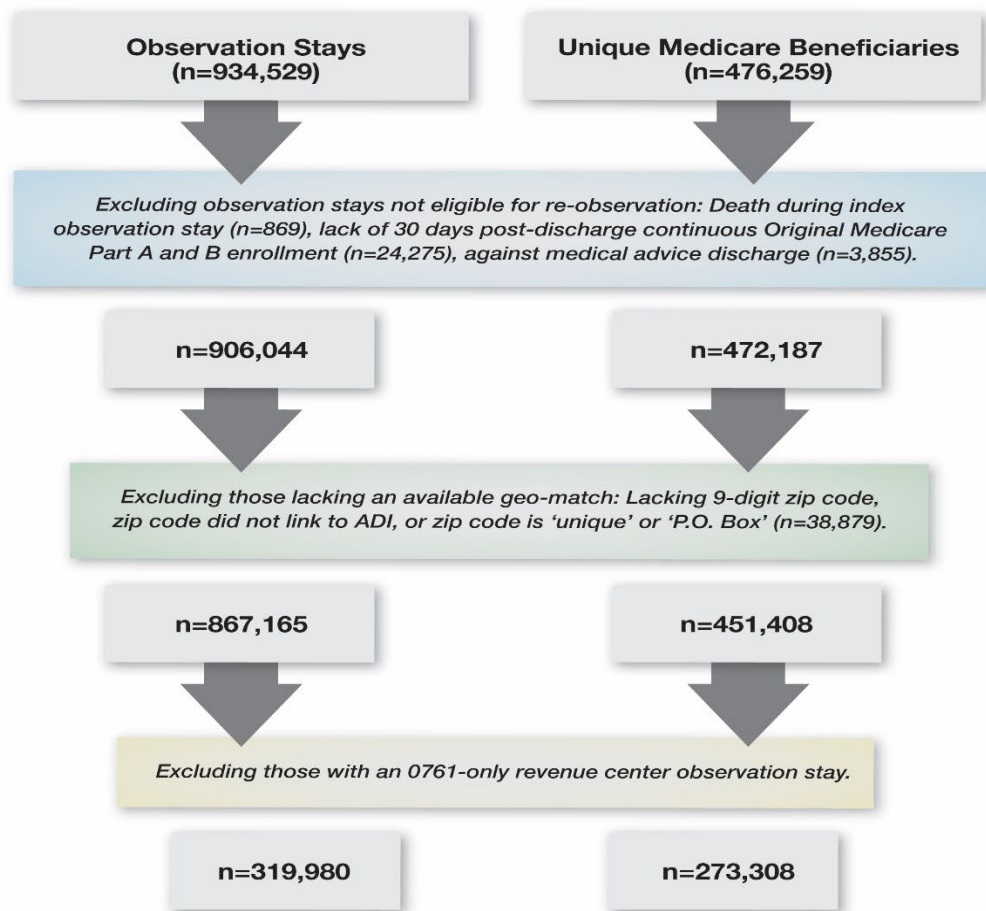

<sup>a</sup>Included observation stays that met the University of Wisconsin definition based on observation revenue center codes, and had standard exclusions applied, including hospitalization at exempt cancer hospitals (n=13,872) or non-acute care facilities such as rehabilitation or psychiatric hospitals (n=11,235), or beneficiaries with non-continuous Medicare enrollment for 12 months prior to index encounter (n=37,469), those with railroad benefits (n=5,637), or Medicare Advantage (n=33,570). Additionally, observation stays were excluded if they lacked daily consecutive observation revenue center codes for the stay (n=71,194) as an additional quality control measure to exclude potentially erroneous stays.

Supplemental Table 1. Level 1 Clinical Classification Software codes for re-observation diagnoses.

| Level 1 Diagnoses                                                                 | Most Disadvantaged 15%<br>n (%) | Least Disadvantaged 85%<br>n (%) |
|-----------------------------------------------------------------------------------|---------------------------------|----------------------------------|
| Neoplasms                                                                         | 49 (1.7)                        | 507 (3.7)                        |
| Diseases of the circulatory system                                                | 1005 (35.2)                     | 4306 (31.8)                      |
| Complications of pregnancy; childbirth; and the puerperium                        | 56 (2)                          | 171 (1.3)                        |
| Injury and poisoning                                                              | 159 (5.6)                       | 921 (6.8)                        |
| Infectious and parasitic diseases                                                 | 24 (0.8)                        | 63 (0.5)                         |
| Mental illness                                                                    | 55 (1.9)                        | 351 (2.6)                        |
| Diseases of the nervous system and sense organs                                   | 172 (6)                         | 957 (7.1)                        |
| Diseases of the genitourinary system                                              | 140 (4.9)                       | 788 (5.8)                        |
| Diseases of the respiratory system                                                | 203 (7.1)                       | 833 (6.2)                        |
| Residual codes; unclassified; all E codes [259. and 260.]                         | 79 (2.8)                        | 298 (2.2)                        |
| Endocrine; nutritional; and metabolic diseases and immunity disorders             | 175 (6.1)                       | 735 (5.4)                        |
| Diseases of the skin and subcutaneous tissue                                      | 63 (2.2)                        | 255 (1.9)                        |
| Symptoms; signs; and ill-defined conditions and factors influencing health status | 259 (9.1)                       | 1297 (9.6)                       |
| Diseases of the musculoskeletal system and connective tissue                      | 150 (5.3)                       | 758 (5.6)                        |
| Diseases of the blood and blood-forming organs                                    | 93 (3.3)                        | 468 (3.5)                        |
| Congenital anomalies                                                              | a                               | a                                |
| Diseases of the digestive system                                                  | 173 (6.1)                       | 827 (6.1)                        |

<sup>a</sup>Cell suppressed due to CMS data use agreement requiring cells of less than 10 to be suppressed.

Supplemental Table 2. Unadjusted and fully adjusted 30-day re-observation risk for each individual covariate.

| Key Characteristic                               | Crude | 95% CI    | Adjusted | 95% CI    |
|--------------------------------------------------|-------|-----------|----------|-----------|
|                                                  | OR    |           | OR       |           |
| <b>Key exposure variable</b>                     |       |           |          |           |
| Most disadvantaged 15%                           | 1.43  | 1.31-1.55 | 1.13     | 1.04-1.22 |
|                                                  |       |           |          |           |
| <b>Patients</b>                                  |       |           |          |           |
| 18-39 y                                          | 1.00  |           | 1.00     |           |
| 40-49 y                                          | 0.71  | 0.58-0.87 | 0.72     | 0.60-0.87 |
| 50-59 y                                          | 0.55  | 0.45-0.67 | 0.57     | 0.47-0.68 |
| 60-69 y                                          | 0.35  | 0.30-0.42 | 0.47     | 0.39-0.57 |
| 70-79 y                                          | 0.31  | 0.26-0.37 | 0.47     | 0.38-0.57 |
| >=80 y                                           | 0.32  | 0.27-0.38 | 0.51     | 0.41-0.63 |
| Female                                           | 0.87  | 0.82-0.92 | 0.90     | 0.85-0.95 |
| Race                                             |       |           |          |           |
| White, unknown                                   | 1.00  |           | 1.00     |           |
| African American                                 | 1.45  | 1.33-1.59 | 1.07     | 0.99-1.15 |
| Other race                                       | 1.04  | 0.95-1.15 | 0.89     | 0.81-0.98 |
| Medicaid                                         | 1.72  | 1.63-1.83 | 1.14     | 1.07-1.20 |
| Disabled                                         | 1.66  | 1.57-1.76 | 1.01     | 0.93-1.09 |
| Rural-urban commuting area for patient residence |       |           |          |           |
| Urban core area, unknown                         | 1.00  |           | 1.00     |           |
| Suburban area                                    | 0.90  | 0.81-1.00 | 0.88     | 0.80-0.97 |
| Large rural area                                 | 0.99  | 0.91-1.07 | 0.90     | 0.84-0.97 |

| Key Characteristic                                  | Crude |           | Adjusted |           |
|-----------------------------------------------------|-------|-----------|----------|-----------|
|                                                     | OR    | 95% CI    | OR       | 95% CI    |
| Small town/isolated rural                           | 1.15  | 1.06-1.24 | 0.92     | 0.85-1.00 |
| Hierarchical condition category score in prior year | 1.21  | 1.20-1.23 | 1.07     | 1.05-1.10 |
| Comorbid conditions in year prior                   |       |           |          |           |
| Hypertension                                        | 1.64  | 1.55-1.74 | 1.18     | 1.11-1.27 |
| Uncomplicated diabetes                              | 1.44  | 1.36-1.53 | 1.01     | 0.95-1.08 |
| Fluid and electrolyte disorders                     | 1.93  | 1.83-2.03 | 1.17     | 1.10-1.24 |
| Chronic pulmonary disease                           | 1.63  | 1.55-1.73 | 1.07     | 1.01-1.14 |
| Deficiency anemia                                   | 1.87  | 1.76-1.98 | 1.16     | 1.09-1.23 |
| Hypothyroidism                                      | 1.13  | 1.07-1.20 | 1.00     | 0.94-1.06 |
| Depression                                          | 1.91  | 1.80-2.03 | 1.22     | 1.15-1.28 |
| Congestive heart failure                            | 1.78  | 1.66-1.91 | 1.12     | 1.05-1.19 |
| Renal failure                                       | 1.73  | 1.61-1.86 | 1.07     | 1.00-1.15 |
| Other neurologic disorders                          | 1.49  | 1.41-1.58 | 1.03     | 0.97-1.09 |
| Peripheral vascular disease                         | 1.55  | 1.44-1.68 | 1.13     | 1.04-1.22 |
| Obesity                                             | 1.68  | 1.58-1.78 | 1.06     | 0.99-1.13 |
| Valvular disease                                    | 1.38  | 1.26-1.50 | 1.07     | 0.98-1.16 |
| Complicated diabetes                                | 1.79  | 1.65-1.94 | 1.04     | 0.95-1.13 |
| Solid tumor without metastasis                      | 1.16  | 1.08-1.25 | 0.99     | 0.91-1.07 |
| Psychoses                                           | 2.11  | 1.97-2.27 | 1.25     | 1.16-1.35 |
| Weight loss                                         | 1.71  | 1.57-1.87 | 0.99     | 0.91-1.09 |
| Coagulopathy                                        | 1.72  | 1.58-1.87 | 0.98     | 0.89-1.08 |
| Rheumatoid arthritis/collagen vascular disease      | 1.24  | 1.12-1.36 | 0.95     | 0.87-1.05 |
| Pulmonary circulation disease                       | 1.98  | 1.71-2.30 | 1.20     | 1.06-1.36 |
| Drug abuse                                          | 3.35  | 3.04-3.70 | 1.65     | 1.49-1.82 |

| Key Characteristic                          | Crude |           | Adjusted |           |
|---------------------------------------------|-------|-----------|----------|-----------|
|                                             | OR    | 95% CI    | OR       | 95% CI    |
| Liver disease                               | 2.01  | 1.78-2.26 | 1.15     | 1.03-1.30 |
| Alcohol abuse                               | 2.18  | 1.90-2.50 | 1.12     | 0.99-1.26 |
| Paralysis                                   | 1.50  | 1.34-1.67 | 0.99     | 0.89-1.11 |
| Metastatic cancer                           | 1.58  | 1.37-1.81 | 1.21     | 1.04-1.40 |
| Chronic blood loss anemia                   | 1.84  | 1.61-2.09 | 1.10     | 0.97-1.26 |
| Lymphoma                                    | 1.48  | 1.23-1.77 | 1.20     | 1.00-1.44 |
| AIDS                                        | 2.26  | 1.77-2.87 | 1.02     | 0.79-1.33 |
| Peptic ulcer disease excluding bleeding     | 1.57  | 1.08-2.28 | 1.01     | 0.69-1.47 |
| Length of index observation hospitalization |       |           |          |           |
| 1 d                                         | 1.00  |           | 1.00     |           |
| 2 d                                         | 0.91  | 0.85-0.97 | 0.89     | 0.83-0.94 |
| 3 d                                         | 0.96  | 0.88-1.05 | 0.93     | 0.85-1.02 |
| >=4 d                                       | 1.34  | 1.14-1.57 | 1.29     | 1.09-1.52 |
| Observation stay originated from ED visit   | 0.65  | 0.61-0.70 | 0.62     | 0.58-0.66 |
| Discharged to skilled-nursing facility      | 0.77  | 0.70-0.85 | 0.63     | 0.57-0.69 |
| <b>Index hospital</b>                       |       |           |          |           |
| Medical school affiliation                  |       |           |          |           |
| Major medical school                        | 1.09  | 1.01-1.18 | 1.03     | 0.96-1.10 |
| Minor medical school                        | 1.08  | 1.02-1.14 | 1.09     | 1.03-1.16 |
| No medical school, unknown                  | 1.00  |           | 1.00     |           |
| Hospital type                               |       |           |          |           |
| Nonprofit, public hospital                  | 1.00  |           | 1.00     |           |
| For-profit hospital                         | 0.92  | 0.84-1.00 | 0.90     | 0.83-0.98 |



| Key Characteristic                 | Crude |           | Adjusted |           |
|------------------------------------|-------|-----------|----------|-----------|
|                                    | OR    | 95% CI    | OR       | 95% CI    |
| Mean annual total discharge volume |       |           |          |           |
| Highest tertile                    | 1.00  |           | 1.00     |           |
| Middle tertile                     | 1.08  | 1.01-1.15 | 1.17     | 1.10-1.25 |
| Lowest tertile                     | 1.59  | 1.41-1.78 | 1.81     | 1.60-2.04 |
